# Supplementary material for: Shape-based separation of microalga Euglena gracilis using inertial microfluidics
Source: PubMed Central journal article supplement (PMC5589772; doi:10.1038/s41598-017-10452-5), 2017-09-07
Supplement: 41598_2017_10452_MOESM4_ESM.pdf [file 41598_2017_10452_MOESM4_ESM.pdf]

# Supplementary Information

## Shape-based separation of microalga *Euglena gracilis* using inertial microfluidics

Ming Li<sup>1,2</sup>, Hector Enrique Muñoz<sup>1</sup>, Keisuke Goda<sup>2,3,4\*</sup>, and Dino Di Carlo<sup>1,5,6\*</sup>

<sup>1</sup>Department of Bioengineering, University of California, Los Angeles, USA

<sup>2</sup>Department of Electrical Engineering, University of California, Los Angeles, USA

<sup>3</sup>Department of Chemistry, University of Tokyo, Japan

<sup>4</sup>Japan Science and Technology Agency, Japan

<sup>5</sup>California NanoSystems Institute, University of California, Los Angeles, USA

<sup>6</sup>Jonsson Comprehensive Cancer Centre, University of California, Los Angeles, USA

\* [dicarlo@seas.ucla.edu](mailto:dicarlo@seas.ucla.edu), [goda@chem.s.u-tokyo.ac.jp](mailto:goda@chem.s.u-tokyo.ac.jp)

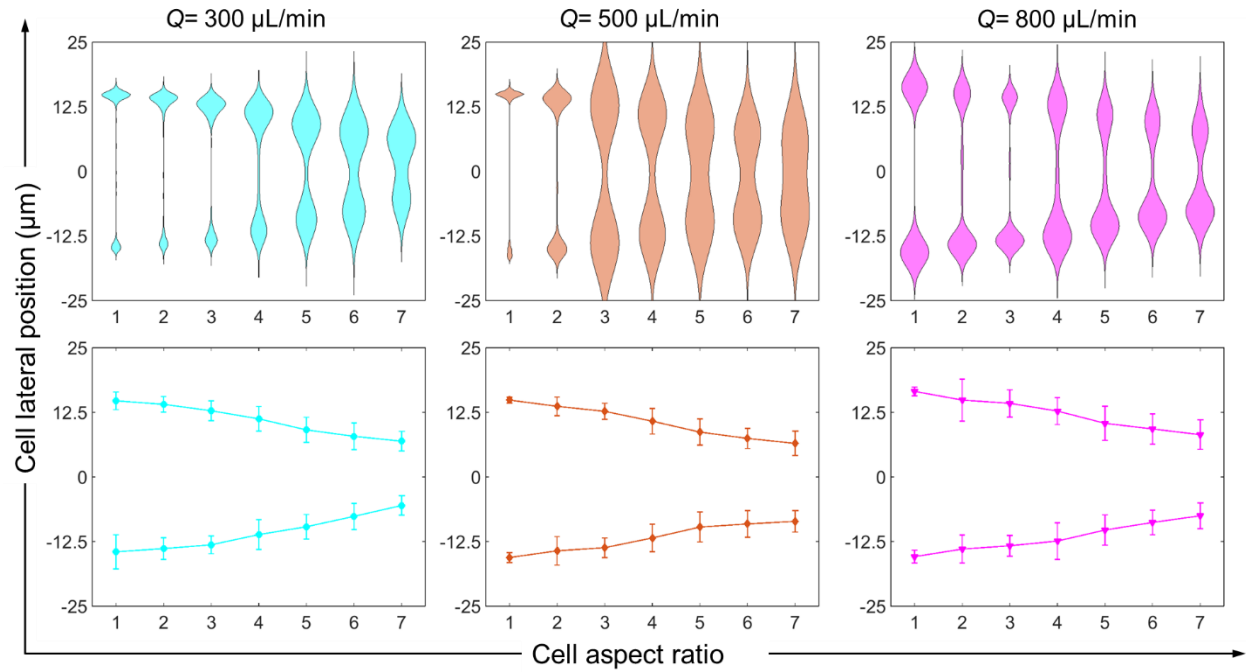

Figure S1 Inertial focusing distributions of *E. gracilis* cells with various aspect ratios ranging from 1 to 7 in a microchannel (width=50  $\mu\text{m}$ , height=90  $\mu\text{m}$ ) at flow rates of 300, 500, and 800  $\mu\text{L}/\text{min}$ .

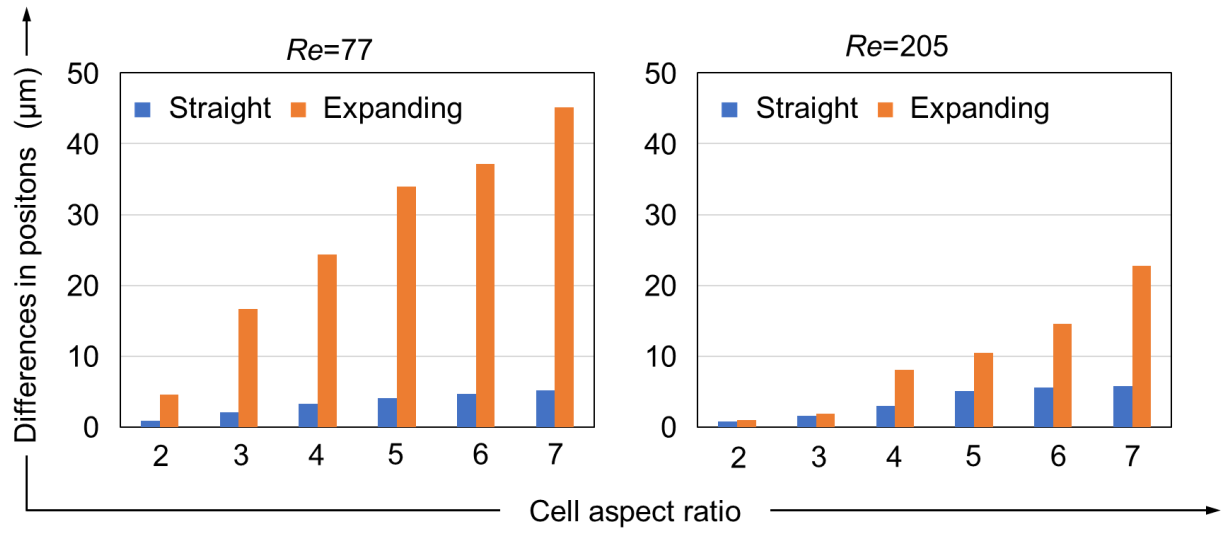

Figure S2 Comparison of differences in averaged lateral positions between *E. gracilis* cells with AR=1 and others (i.e. AR=2-7) in the straight region and the gradually expanding region for  $Re=77$  (left) and  $Re=205$  (right).

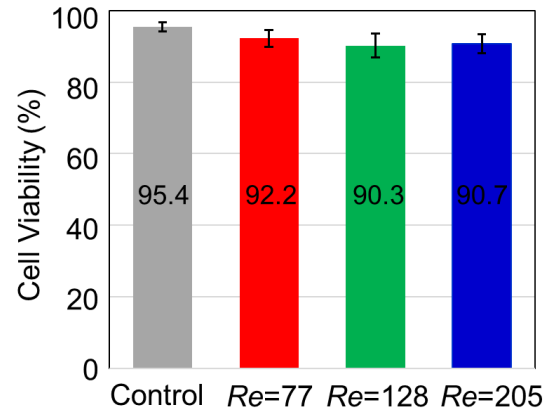

Figure S3 The viability of *E. gracilis* cells was not significantly affected by inertial effects. The standard deviations are obtained from three measurement.

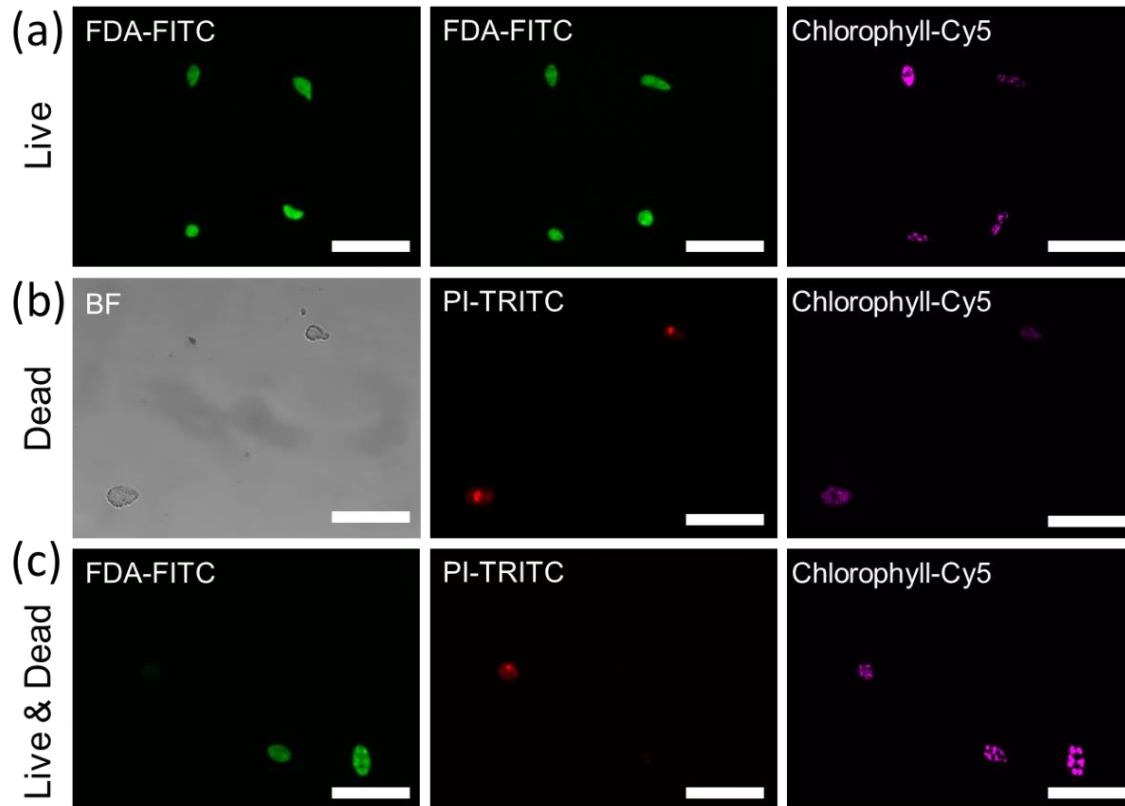

Figure S4 Viability assays of *E. gracilis* cells using fluorescence-based live-dead assays with FDA and PI. (a) Microscopic images of dead cells (from left to right: FDA signal in FITC channel, FDA signal in FITC channel, and chlorophyll auto-fluorescence signal in Cy5 channel). (b) Microscopic images of live cells (from left to right: bright field, PI signal in TRITC channel, and chlorophyll auto-fluorescence signal in Cy5 channel). (c) Microscopic images of live/dead cell mixtures (from left to right: FDA signal in FITC channel, PI signal in TRITC channel, and chlorophyll auto-fluorescence signal in Cy5 channel). Scale bar=50  $\mu$ m.

## Supplementary Movie Captions

### Movie S1

Shape-dependent lateral inertial focusing equilibrium positions for *E. gracilis* cells at an expansion region. High-speed microscopic video at a flow rate of 300  $\mu\text{L}/\text{min}$  ( $\text{Re} = 77$ ).

### Movie S2

Shape based separation of *E. gracilis* cells at outlets 1 and 2. High-speed microscopic video at a flow rate of 300  $\mu\text{L}/\text{min}$  ( $\text{Re} = 77$ ).

### Movie S3

Shape based separation of *E. gracilis* cells at outlet 3. High-speed microscopic video at a flow rate of 300  $\mu\text{L}/\text{min}$  ( $\text{Re} = 77$ ).
